# Supplementary material
Source: HighWire-hosted journal article supplement (https://bibliotheek.ehb.be/content/93/2/88)
Supplement: inline-supplementary-material-1 [file inline-supplementary-material-1.pdf]

**Table S1.** Demographic characteristics, sexual behaviours and gonorrhoea positivity among 196 enrolled men.

|                                                                | Positive for pharyngeal gonorrhoea by NAAT on the day of screening |                     |         |
|----------------------------------------------------------------|--------------------------------------------------------------------|---------------------|---------|
|                                                                | Listerine® group (n=104)                                           | Saline group (n=92) | p value |
| Age, median [IQR]                                              | 27 [23-31]                                                         | 29 [25-33]          | 0.065   |
| Number of male sex partners in the last 3 months, median [IQR] | 5 [3-10]                                                           | 5 [3-10]            | 0.929   |
| Use of spirits in the last 3 months                            |                                                                    |                     | 0.469   |
| <i>Daily</i>                                                   | 2 (2%)                                                             | 1 (1%)              |         |
| <i>Weekly</i>                                                  | 38 (37%)                                                           | 27 (30%)            |         |
| <i>Monthly</i>                                                 | 28 (27%)                                                           | 23 (26%)            |         |
| <i>Less than monthly</i>                                       | 22 (21%)                                                           | 29 (33%)            |         |
| <i>Never</i>                                                   | 14 (13%)                                                           | 9 (10%)             |         |
| Use of mouthwash                                               |                                                                    |                     | 0.825   |
| <i>Daily</i>                                                   | 27 (26%)                                                           | 22 (25%)            |         |
| <i>Weekly</i>                                                  | 26 (25%)                                                           | 22 (25%)            |         |
| <i>Monthly</i>                                                 | 9 (9%)                                                             | 5 (6%)              |         |
| <i>Less than monthly</i>                                       | 8 (8%)                                                             | 12 (13%)            |         |
| <i>Less than 6 monthly</i>                                     | 8 (8%)                                                             | 6 (7%)              |         |
| <i>Never</i>                                                   | 26 (25%)                                                           | 22 (25%)            |         |
| Type of mouthwash                                              |                                                                    |                     | 0.891   |
| <i>Alcohol-based</i>                                           | 28 (36%)                                                           | 23 (34%)            |         |
| <i>Alcohol-free</i>                                            | 31 (40%)                                                           | 27 (40%)            |         |
| <i>Unsure</i>                                                  | 18 (23%)                                                           | 18 (26%)            |         |
| HIV positive                                                   |                                                                    |                     | 0.638   |
| <i>Yes</i>                                                     | 12 (12%)                                                           | 8 (9%)              |         |
| <i>No</i>                                                      | 92 (88%)                                                           | 84 (91%)            |         |
| Pharyngeal gonorrhoea on the day before the intervention       |                                                                    |                     | 0.532   |
| <i>Culture positive</i>                                        | 33 (32%)                                                           | 25 (27%)            |         |
| <i>Culture negative</i>                                        | 71 (68%)                                                           | 67 (73%)            |         |
